# Supplementary material for: Synthesis of a new 1,3,4-thiadiazole-substituted phenanthroimidazole derivative, its growth on glass/ITO as a thin film and analysis of some surface and optoelectronic properties
Source: Royal Society of Chemistry journal article supplement (doi:10.1039/d1nj04375g), 2021-01-01
Supplement: d1nj04375g1.pdf [file d1nj04375g1.pdf]

The spectrum obtained from high resolution mass spectrum of PMItz is shown in Figure S1 (positive scan) and Figure S2 (negative scan). Calculated: 497.61, LC-MSMS: 496.10 [M-H], 498.10 [M+H].

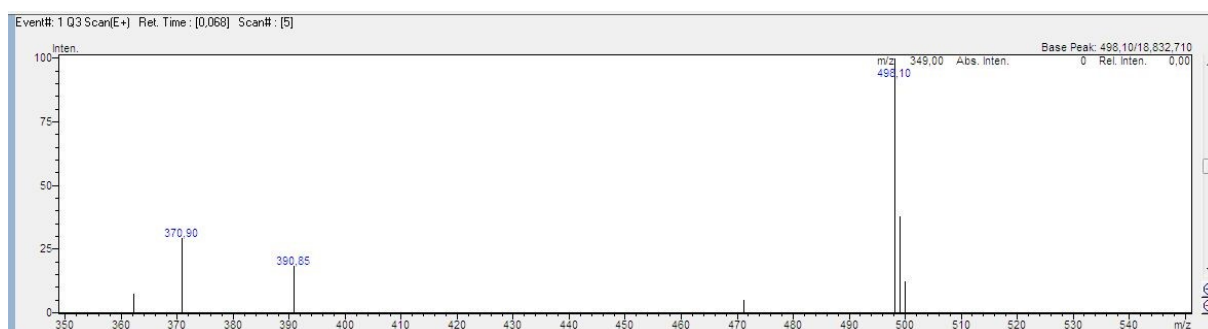

**Fig S1.** Mass spectrum of PMItz [M+H].

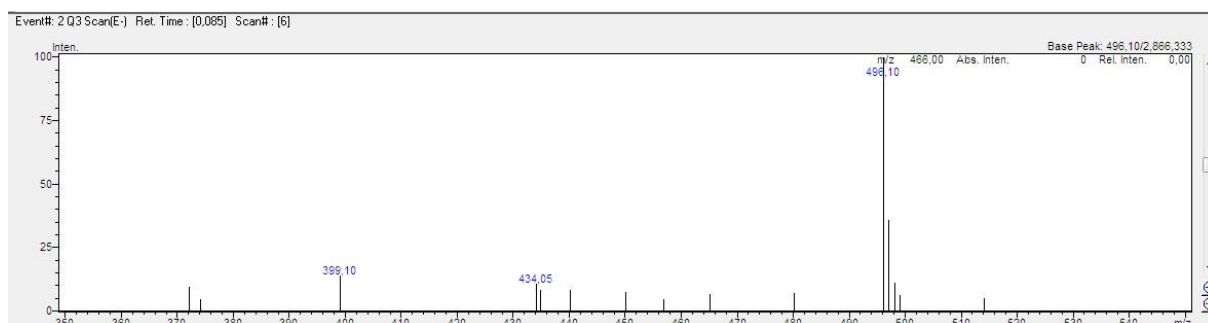

**Fig S2.** Mass spectrum of PMItz [M-H].

FT-IR spectrum of PMItz is given in Figure S3.

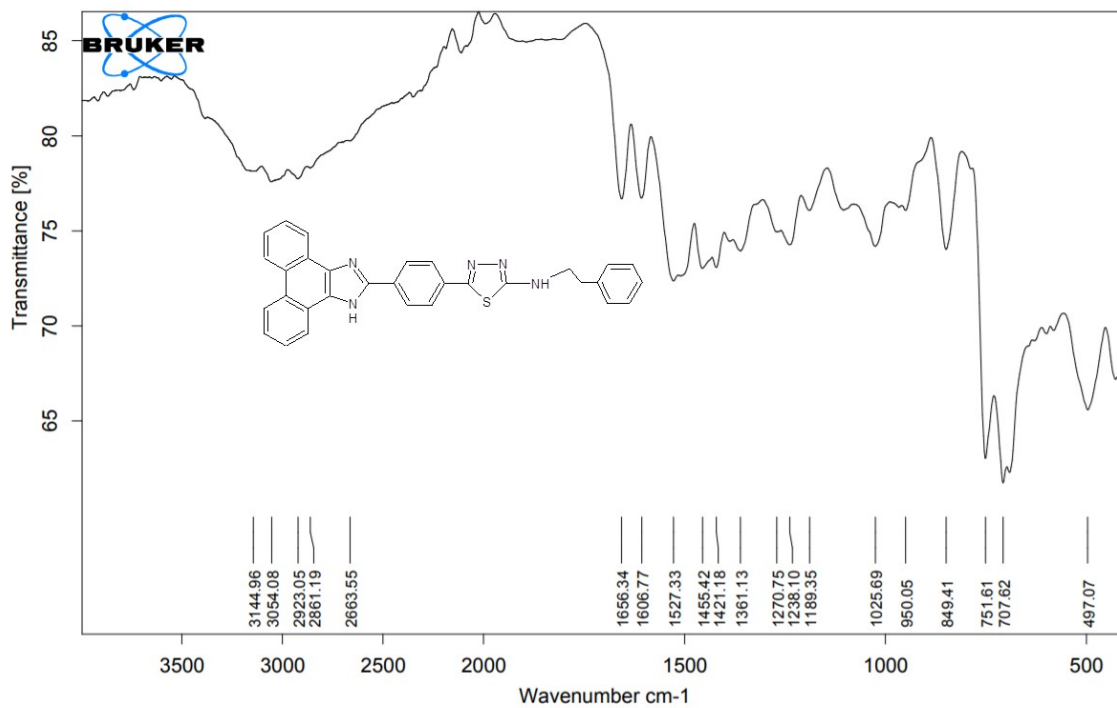

**Fig S3.** FT-IR spectrum of PMItz

$^1\text{H-NMR}$  spectrum of PMItz is given in Figure S4.

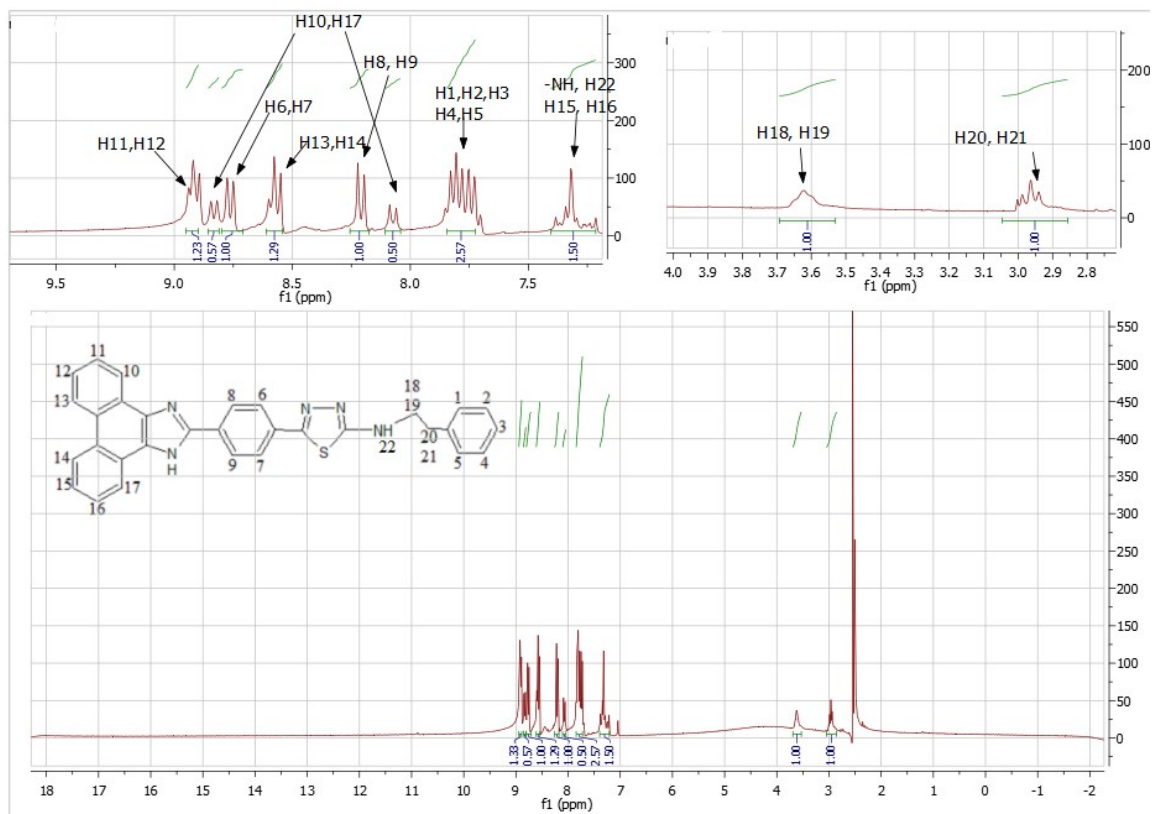

**Fig S4.**  $^1\text{H-NMR}$  spectrum of PMItz

Digital photos of the devices are given in Figure S5.

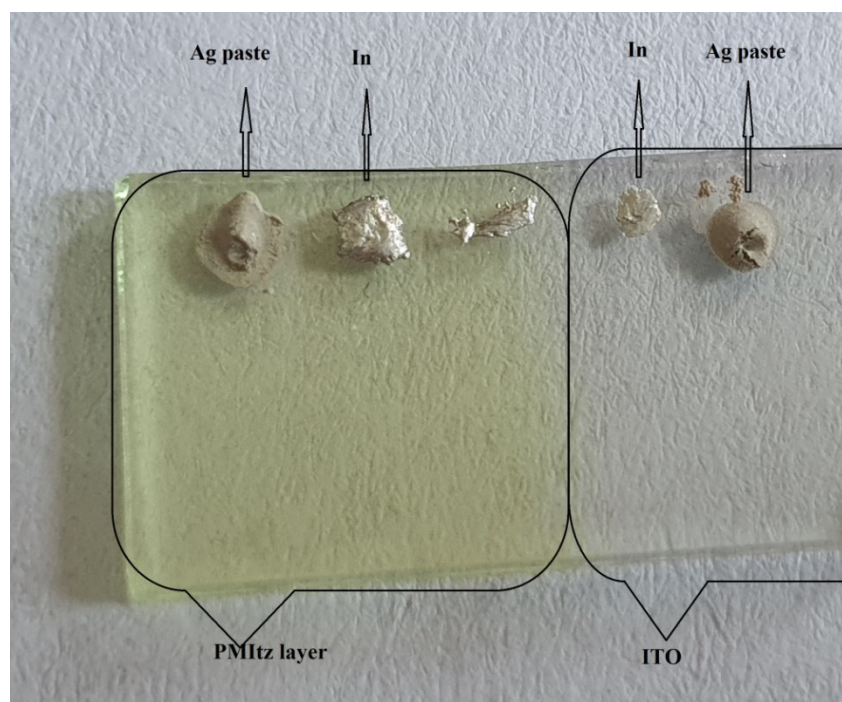

**Figure S5.** Digital photos of the device

$$\Phi_s = \frac{A_r I_s (n_s)^2}{A_s I_r (n_r)^2} \Phi_r$$

Where  $\Phi$ ,  $A$ ,  $I$ ,  $n$  are quantum yields, absorptions, intensities and refractive indexes of reference (r) and sample (s)
